# Supplementary material
Source: Springer Nature journal article supplement (https://www.springermedizin.de/resource/supplementary/12992_2012_218_MOESM2_ESM.pdf/9616700)
Supplement: MOESM2 [file 9616700]

Use Exclusion / Inclusion  
criteria to determine:  
Is activity HSS?

Yes

No

Classify activity using HSS Funding  
Assessment Framework

Classify activity as Grant  
Management; Salary / Per Diem;  
Commodities, Diagnostics, &  
Drugs; or Other

Does the activity target a disease?

Yes

No

Disease-specific

System-wide
